# 1 **Assessing long-read sequencing with Nanopore R9, R10 and PacBio CCS to obtain** 2 **high-quality metagenome assembled genomes from complex microbial** 3 **communities**

4 Mantas Sereika<sup>a\*</sup>, Rasmus Hansen Kirkegaard<sup>a\*</sup>, Søren Michael Karst<sup>a</sup>, Thomas Yssing Michaelsen<sup>a</sup>,  
5 Emil Aare Sørensen<sup>a</sup> and Mads Albertsen<sup>a\*\*</sup>

6  
7 <sup>a</sup>Center for microbial communities, Aalborg University, Denmark  
8

9 \*These authors contributed equally to the paper

10 \*\*Corresponding author [ma@bio.aau.dk](mailto:ma@bio.aau.dk)

## 11 **Abstract**

12 Short-read DNA sequencing has led to a massive growth of genome databases but mainly with highly  
13 fragmented metagenome assembled genomes from environmental systems. The fragmentation is  
14 a result of closely related species, strains, and genome repeats that cannot be resolved with short  
15 reads. To confidently explore the functional potential of a microbial community, high-quality  
16 reference genomes are needed. In this study, we evaluated the use of different combinations of  
17 short (Illumina) and long-read technologies (Nanopore R9.4, R10.3, and PacBio CCS) for recovering  
18 high-quality metagenome assembled genomes (HQ MAGs) from a complex microbial  
19 community (anaerobic digester). Depending on the sequencing approach, 33 to 86 HQ MAGs  
20 (encompassing up to 34 % of the assembly and 49 % of the reads) were recovered using long reads,  
21 with Nanopore R9 featuring the lowest sequencing costs per HQ MAG recovered. PacBio CCS was  
22 also found to be an effective platform for genome-centric metagenomics (74 HQ MAGs) and  
23 produced HQ MAGs with the lowest fragmentation (median of 9 contigs) as a stand-alone  
24 technology. Using PacBio CCS MAGs as reference, we show that, although a high number of high-  
25 quality MAGs can be generated using Nanopore R9, systematic indel errors are still present, which

26 can lead to truncated gene calling. However, polishing the Nanopore MAGs with short-read Illumina  
27 data, enabled recovery of MAGs with similar quality as MAGs from PacBio CCS.

## 28 Importance

29 Multiple approaches exist for performing genome-centric metagenomics to recover high-quality  
30 genomes from microbial communities. The plethora of possible sequencing strategies can be  
31 cumbersome for designing metagenomics projects, especially under limited budget conditions.  
32 Here, we performed single sequencing runs of the same complex microbial community sample using  
33 Illumina MiSeq, Oxford Nanopore MinION and PacBio Sequel II to assess the performance of each  
34 platform. We show that, in general, long read sequencing significantly outperforms the short read  
35 Illumina platform for recovering microbial genomes. In addition, we observed that the hybrid  
36 Nanopore-Illumina approach recovers genomes of comparable quality to PacBio CCS, while  
37 maintaining lower sequencing costs per genome recovered. For this reason, we find the  
38 Nanopore R.9.4.1 and supplemental Illumina read polishing to be, at the moment of writing, the  
39 most cost-effective sequencing strategy for *de novo* acquisition of high-quality genomes.

40

## 41 Introduction

42 Bacteria live in almost every environment on Earth and a recent analysis of the global microbial  
43 diversity estimated a total of  $10^{12}$  species (1). To obtain representative genomes culturing has been  
44 used to isolate specific microbes, but the throughput is highly limited. Recently, genome recovery  
45 from metagenomes with short, high-quality reads has drastically improved genome recovery for  
46 uncultivated species (2–4), and has spurred multiple tools for automated binning of draft  
47 genomes (5–8). This has led to studies reporting thousands or even hundreds of thousands of  
48 genomes (9–13). However, the recovered metagenome assembled genomes (MAGs) are often very  
49 fragmented, incomplete, and contaminated with genome fragments from other microbes. Hence,  
50 even though the pace of genome sequencing is increasing, only a tiny fraction of the estimated  
51 microbial diversity have representative genomes (14) with 47,894 species having representative  
52 genomes in the Genome Taxonomy Database (GTDB) version 202 (15).

53

54 Recovering genomes from metagenomes using short reads is challenging due to the presence of  
55 genetic repeat elements. From an assembly point-of-view, repeat elements are classified as  
56 identical DNA segments that are not able to be spanned by the length of the sequenced reads. For  
57 example, the 16S ribosomal RNA gene is highly conserved between species, can be present in  
58 multiple copies within species, and is much longer than the typical short reads. This either breaks  
59 up the assembly graph or produce chimeric segments (16, 17). In complex microbial communities a  
60 large source of repeat elements originates from closely related microbial strains that share large  
61 parts of their genomic content. The repeat elements have a coverage that is different from the rest  
62 of the genome, and are thus often not picked up by automated binning tools (11). In addition,

63 genomes can also be contaminated with fragments from other organisms that just happen to  
64 correlate with the binned genome (11, 14, 18). Tools have been developed to estimate the  
65 completeness and the level of contamination and even “decontaminate” the bins (16, 18). However,  
66 they rely heavily on good reference databases and assumptions about universal essential single copy  
67 genes that are known not to be truly universal (19, 20). Maybe the only way to be certain about the  
68 completeness of a genome is to produce closed MAGs as in the case of circular chromosomes (21).  
69 This is especially important as repeat regions may contain biological information that is essential to  
70 understand a microbial community (22), as have been shown for some antimicrobial resistance  
71 genes (23).

72

73 Long-range information is, to a large degree, capable of solving the genome fragmentation caused  
74 by repeat elements (24). Different approaches have been developed to generate such data, e.g.  
75 mate-pair sequencing, synthetic long-read sequencing, and long-read single molecule sequencing,  
76 such as offered by Pacific Biosciences sequencing (PacBio) and Oxford Nanopore Technologies (25–  
77 32). All of these techniques have been used to recover genomes from metagenomes in  
78 environments of varying complexity and recent technological breakthroughs deliver vastly  
79 increased data yields, which makes even higher complexity samples tractable (12, 33–38). However,  
80 long read sequencing technologies feature drawbacks of their own, as the PacBio platform is  
81 relatively costly (39, 40), while Nanopore sequencing exhibits systematic errors in homopolymer  
82 regions that can lead to insertions and deletions in the assemblies (41, 42).

83

84 Here, we assess the recent DNA sequencing technologies in the context of genome-centric, high-  
85 throughput metagenomics under realistic scenarios for a typical small research project. We compare  
86 metagenome assembly, binning, rRNA and protein gene recovery between single flow cell  
87 sequencing runs of Illumina MiSeq and Oxford Nanopore MinION R.9.4.1 and R.10.3 (referred to as  
88 R9 and R10 hereafter) and PacBio Sequel II (circular consensus sequencing).

89

## 90 Results and discussion

91 DNA of a microbial community from an anaerobic digester was sequenced via Illumina MiSeq (2x300  
92 bp), PacBio CCS and the Oxford Nanopore MinION platform, using R9 and R10 chemistry flow cells  
93 (**Fig 1a**). The reads from different sequencing platforms were then assembled using Megahit for  
94 short reads and metaFlye for long reads. Despite being the same sample of extracted DNA, direct  
95 comparisons are difficult as the additionally size selection of the PacBio CCS dataset both increased  
96 the read length (**Fig 1b**) and altered the relative abundances of the species in the sample (**Fig S1a**).  
97 The Illumina data also features variation in relative abundances (**Fig S1b**), presumably due to GC  
98 bias (43). Only the R9 and R10 relative abundance data correlated well (**Fig S1c**), even though they  
99 had a 2.7-fold difference in sequencing yield (**Table 1**). Hence, the comparisons are influenced by  
100 differences in sequencing depth, read length, library preparation technique (44) and changes to  
101 relative abundances of the community members, but still represent a realistic scenario for a typical  
102 research project.

103

104

105

106

**Table 1. General statistics for sequenced reads and assembled contigs.**

| Data type | Feature                     | Illumina   | Nanopore R9 | Nanopore R10 | PacBio CCS |
|-----------|-----------------------------|------------|-------------|--------------|------------|
| Reads     | Total count                 | 47,091,904 | 10,266,261  | 3,646,771    | 992,914    |
|           | Total yield (Mb)            | 13,285     | 35,237      | 13,009       | 15,309     |
|           | N50 (kb)                    | 0.3        | 5.9         | 6.4          | 15.4       |
|           | Modal read accuracy (%)*    | 99.98      | 96.34       | 95.81        | 99.97      |
| Contigs** | Total count                 | 145,876    | 24,680      | 13,132       | 8,989      |
|           | Circular, > 0.5 Mb count    | 0          | 7           | 5            | 9          |
|           | Total size (Mb)             | 409        | 754         | 395          | 606        |
|           | N50 (kb)                    | 3.5        | 79.9        | 71.7         | 172.5      |
|           | Reads mapped to contigs (%) | 88.1       | 93.5        | 93.2         | 95.2       |

107

\*Derived from read Phred scores.

108

\*\*Assembly metrics are presented after removing < 1 kb contigs.

109

110 To assist automated contig binning, we performed Illumina sequencing of 9 additional samples from  
 111 the same anaerobic digester spread over 9 years (**Supp Table 1**) and used the coverage profiles as  
 112 input for binning. Furthermore, to evaluate the impact of micro-diversity on MAG quality, we  
 113 calculated the polymorphic site rates for each MAG as a simple proxy for presence of micro-  
 114 diversity (10).

115

116 After performing automated contig binning it is evident that micro-diversity has a large impact on  
 117 MAG fragmentation, but that long-read sequencing results in much less fragmentation (**Fig 1c-d**) of  
 118 bins at higher amounts of micro-diversity (**Fig 2a**). Despite large differences in read length for  
 119 Nanopore and PacBio CCS data (N50 read length 6 kbp vs. 15 kbp), only small differences in bin  
 120 fragmentation were observed, as compared to the Illumina-based results.

121

122 After performing bin quality estimates, the most HQ MAGs were recovered by using Nanopore  
 123 sequencing on a R9 flow cell (n=86), supplemented with Illumina read polishing, while also featuring  
 124 the second lowest laboratory costs per recovered HQ MAG (**Table 2**). The second highest number  
 125 of HQ MAGs (n=74) was achieved via PacBio CCS, which also exhibited the least HQ MAG

126 fragmentation in terms median contigs per bin (n=9), although the overall sequencing costs per  
 127 HQ MAG recovered were greater, compared to other long read approaches.

128

129 **Table 2.** Results for automated contig binning. Genome quality was defined based on the MiMAG  
 130 (14) standard using CheckM (18): HQ MAGs are defined by completeness of >90 %, <5 %  
 131 contamination, at least 18 distinct tRNA genes and the 5S, 16S, 23S rRNA genes occurring at least  
 132 once. MQ MAGs by completeness >50 % and contamination <10 %, while low quality MAGs are  
 133 defined by completeness <50 % and contamination <10 %. MAGs with contamination estimates  
 134 higher than 10 % were classified as contaminated. \*Fraction of the assembled contigs (> 1kb) that  
 135 were placed into bins. \*\*Sequencing costs refers to the expenses encountered at the time of  
 136 conducting the experiments and may differ for other research groups, depending on agreements  
 137 with sequencing service providers.

| Feature                          | Illumina<br>MiSeq | Nanopore<br>R9 | Nanopore<br>R9 + Illumina | Nanopore<br>R10 | Nanopore<br>R10 + Illumina | PacBio<br>CCS |
|----------------------------------|-------------------|----------------|---------------------------|-----------------|----------------------------|---------------|
| HQ MAGs                          | 8                 | 64             | 86                        | 33              | 45                         | 74            |
| MQ MAGs                          | 83                | 114            | 95                        | 64              | 63                         | 72            |
| LQ MAGs                          | 3                 | 28             | 26                        | 18              | 12                         | 22            |
| Contaminated MAGs                | 10                | 6              | 13                        | 6               | 6                          | 14            |
| Reads binned (%)                 | 76                | 86             | 85                        | 86              | 86                         | 83            |
| Contigs binned (%)*              | 55                | 68             | 71                        | 71              | 74                         | 73            |
| Contigs per<br>HQ MAG (median)   | 184               | 15             | 16                        | 15              | 18                         | 9             |
| Contigs binned in HQ<br>MAGs (%) | 4                 | 22             | 30                        | 22              | 29                         | 34            |
| Reads binned in HQ<br>MAGs (%)   | 16                | 46             | 49                        | 39              | 41                         | 48            |
| Sequencing costs (\$)**          | 1,200             | 811            | 2,011                     | 811             | 2,011                      | 4,420         |
| Cost per HQ MAG (\$)             | 150               | 13             | 23                        | 25              | 45                         | 60            |

138

139 After further examining MAG quality estimates between the clustered bins (see Materials and  
 140 methods for clustering details) of different sequencing platforms, MAGs from PacBio CCS were  
 141 found to feature greater mean bin completeness estimates (**Fig 2b**) than the Illumina-only  
 142 approach ( $93.3 \pm 6.2$  vs.  $89.3 \pm 8.2$ , respectively, paired t-test  $p=0.0001$ ). Furthermore, polishing of  
 143 Nanopore assemblies with Illumina reads was observed to slightly improve the mean bin  
 144 completeness for both R9 (from  $91.9 \pm 5.4$  to  $93.5 \pm 4.7$  %,  $p=0.0009$ ) and R10 (from  $91.9 \pm 6.0$  to  
 145  $93.1 \pm 5.9$  %,  $p=0.021$ ) chemistries. The observed increase in bin completeness from Illumina read

146 polishing is assumed to be caused by improved recovery of protein sequences (bin completeness  
147 estimation is based on the presence of marker proteins (18)), due to correction of Nanopore  
148 sequencing systematic errors, such as homopolymer truncation that can artificially induce  
149 frameshifts, and thus introduce early stop codons in genes (45, 46).  
150

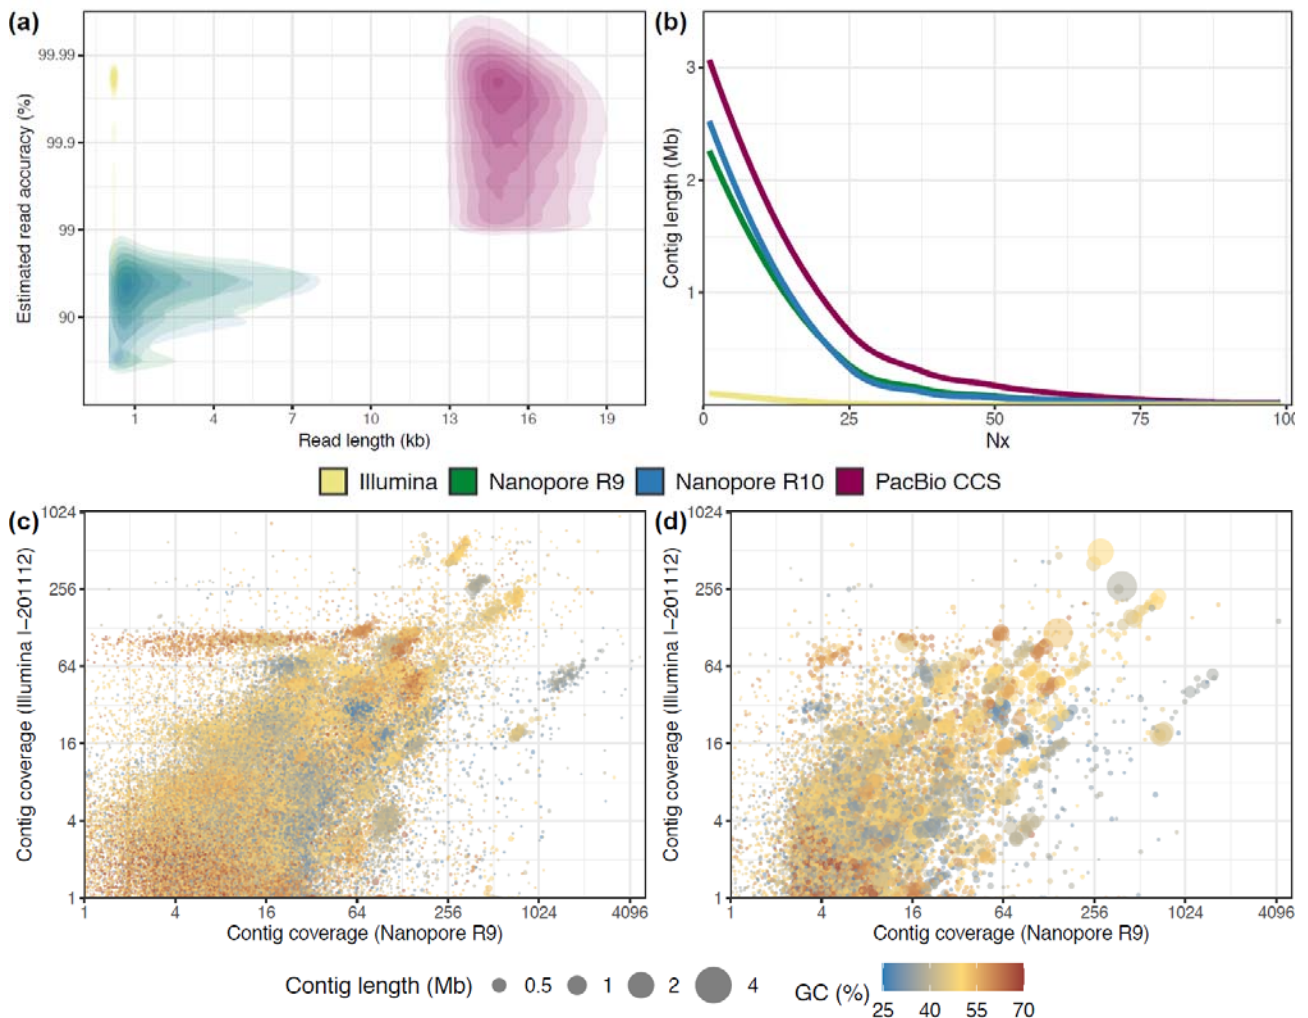

151 **Figure 1. Overview of general sequencing results from short and long read platforms. a)** Read  
152 length and estimated accuracy (inferred from Phred scores, log-scaled) distributions of the read  
153 datasets. **b)** Contig Nx plot for the assembled metagenomes (after 1 kb length filtering). Differential  
154 coverage plots are presented for **c)** Illumina and **d)** Nanopore R9 metagenome assemblies.  
155

156



157 Although Illumina read polishing increases the overall completeness estimates of Nanopore-  
158 assembled bins, the improvements are case-specific, due to differences in coverage and  
159 homopolymer content and the degree of micro-diversity between MAGs. To investigate this further,  
160 PacBio CCS bins were assumed as “reference quality” and compared to bins from Nanopore  
161 sequencing with and without short read polishing (see Materials and Methods for selection criteria).  
162 Applying Illumina read polishing was found to reduce the rate of indels (by at least 20 %) in 18 of 18  
163 Nanopore R9 bins and 14 of 15 R10 bins, independent of coverage (**Fig 2c**). Interestingly, the  
164 estimated reduction in mismatches (at least 20 %) was less pronounced, as it was observed in 6 of  
165 18 Nanopore R9 bins and 8 of 15 for R10, presumably due to Nanopore R10 bins featuring overall  
166 lower long read coverage (**Fig 2d**). Hence, even though it is possible to acquire HQ MAGs from  
167 Nanopore-only assemblies, as demonstrated in this and other studies (47, 48), supplemental  
168 Illumina read polishing still aids in recovering more HQ MAGs (**Table 2**) from complex microbial  
169 communities as well as producing presumably less erroneous genome sequences.

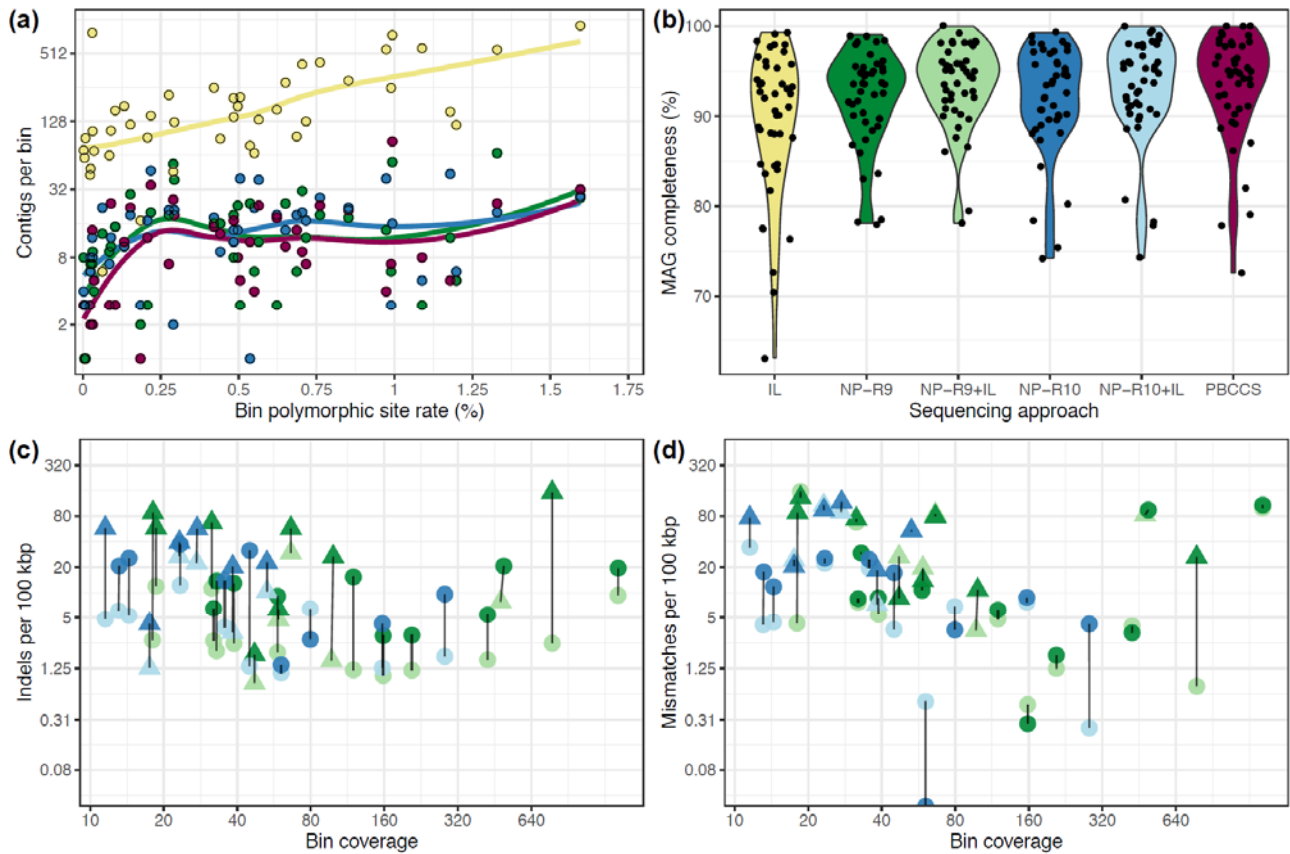

170 **Figure 2. Comparison of bins from different sequencing approaches.** **a)** MAG fragmentation (log-  
 171 scaled) at different bin SNP rates in PacBio CCS MAGs. **b)** Genome bin completeness estimates for  
 172 different sequencing platforms. IL — Illumina, NP — Nanopore, PBCCS — PacBio CCS. Bin **c)** indel  
 173 and **d)** mismatch rates (log-scaled) for MAGs from Nanopore sequencing with and without Illumina  
 174 read polishing, compared to MAGs from PacBio CCS. The presented bin coverage on the x axis (log-  
 175 scaled) is for the corresponding Nanopore chemistry type. HQ MAGs are represented by circle, while  
 176 triangles denote MQ MAGs. For all figures, only the bins that were clustered together between all  
 177 the different sequencing platforms (see Materials and methods) are presented.  
 178

179

180 Reduction of indel rates in genomes is expected to yield less truncated protein sequences (49). To  
 181 investigate this we used the IDEEL test (12) that estimates protein length by comparing to known  
 182 sequences. In the MAGs using Nanopore R9 or R10 data alone, respectively 15 % and 14 % of protein  
 183 sequences were estimated to exhibit a greater than 20 % truncation, while proteins from the hybrid  
 184 Nanopore and Illumina approach were found to be of comparable length to that of PacBio CCS (3-  
 185 4 %, Table 3). Furthermore, Illumina-only bins were observed to feature slightly increased estimated

186 protein truncation levels than PacBio CCS and the hybrid approach, although the following is  
187 expected to be influenced by the generally shorter contig lengths, leading to a higher count of  
188 fragmented protein sequences (50).

189

190

**Table 3. Protein sequence distribution (%) at different estimated truncation rates.**

| Query-to-Subject length ratio intervals | Illumina | Nanopore R9 | Nanopore R9 + Illumina | Nanopore R10 | Nanopore R10 + Illumina | PacBio CCS |
|-----------------------------------------|----------|-------------|------------------------|--------------|-------------------------|------------|
| <b>1.0-0.8</b>                          | 90.89    | 85.01       | 96.69                  | 85.56        | 96.37                   | 96.38      |
| <b>0.8-0.6</b>                          | 3.03     | 4.51        | 1.30                   | 4.51         | 1.40                    | 1.41       |
| <b>0.6-0.4</b>                          | 2.48     | 4.40        | 0.90                   | 4.35         | 1.00                    | 0.97       |
| <b>0.4-0.2</b>                          | 2.29     | 4.21        | 0.77                   | 3.91         | 0.83                    | 0.87       |
| <b>0.2-0.0</b>                          | 1.31     | 1.87        | 0.33                   | 1.66         | 0.40                    | 0.37       |

191

192 A known source of errors in Nanopore-based assemblies is systematic homopolymer miscalling.  
193 Similarly to the IDEEL test, using MAGs from PacBio CCS as a reference, Nanopore-only MAGs were  
194 found to feature increased homopolymer errors at longer lengths, especially for cytosine and  
195 guanine homopolymers (**Fig S3**), which coincides with read-level error rates of Nanopore  
196 sequencing (51). As expected, sequences from Nanopore R10 featured lower rates of homopolymer  
197 miscalling than R9 and the hybrid assemblies featured reduced error profiles, similar to that of  
198 Illumina-only assemblies.

199

200 To reiterate, although the benefits of the hybrid Nanopore and Illumina approach have been  
201 reported in numerous projects (52–59), our study utilized PacBio CCS as a means of establishing  
202 reference sequences for examining the effects of short read polishing on Nanopore bins that were  
203 recovered from a complex microbial community. Given that short read length can be a cause for  
204 mapping issues, often leading to errors and biases in genome recovery (60–62), we observed  
205 evidence that Illumina read polishing of Nanopore bins still significantly reduces the estimated rate

206 of indels, especially homopolymer errors, in a high complexity metagenome. Furthermore, although  
207 multiple bioinformatics workflows for frame-shift correction of Nanopore assemblies without short  
208 reads have been developed (48, 63–65), the indel corrections are not *de novo*, as the workflows are  
209 based on comparisons to reference databases, and hence erroneous sequences of novel genes  
210 might not get corrected or proteins with biologically occurring frame-shift mutations might be  
211 falsely converted to a full-length state, making the method suboptimal for characterising novel  
212 microbial species. Nonetheless, using databases to correct Nanopore sequencing errors could still  
213 be a useful and cost-effective approach, when *de novo* recovery of novel genomic sequences is not  
214 relevant for the research project.

215

216 Lastly, the presence of repetitive DNA sequences, including genes in multiple copies, can lead to  
217 contig breaks in the assembly (66). Ribosomal RNA genes were chosen as an example of repeat gene  
218 as it is also the most widely used marker gene for amplicon sequencing, phylogenetic analysis and  
219 FISH (67–69). Hence, sufficient recovery and binning of rRNA genes is an important aspect of high  
220 throughput genome-centric metagenomics in order to connect MAGs to additional information.

221 Comparing 44 MAGs captured in all assemblies (see Materials and Methods), 13 out of 44 Illumina  
222 bins featured all rRNA genes, while it was 40 for Nanopore R9, 41 for Nanopore R10 and 41 for  
223 PacBio CCS (**Fig S4 a-c**). In the Illumina assembly, the ratio of 16S to 23S rRNA gene counts was  
224 0.76 (**Fig S4 d-e**) indicating either collapsed or fragmented genes as a result of micro-diversity,  
225 whereas for long-read technologies a comparable ratio of  $\sim 1$  was observed (**Supp Table 2**).

226

227

## 228 Conclusion

229 Long read DNA sequencing improves assembly contiguity over short read assemblies and, as a result,  
230 produces significantly greater numbers of high-quality genomes from complex microbial  
231 communities. Recovery of repeated rRNA genes via long read sequencing is also vastly improved  
232 over the short read approach. Nevertheless, short read sequencing is still useful, as an economical  
233 way of acquiring time series data for binning MAGs and it can be combined with Nanopore  
234 sequencing to recover more high-quality genome bins and full protein sequences from  
235 metagenomes. The PacBio CCS platform features overall superior read metrics in terms of accuracy  
236 and length, although the relatively higher sequencing costs can act as a bottleneck for large scale  
237 genome-centric metagenomics projects. Despite the multiple differences between Nanopore and  
238 PacBio CCS platforms, recovering genomes from complex metagenomes via Nanopore R9  
239 sequencing with supplemental short read Illumina polishing was, at the moment of writing, found  
240 to be the optimal strategy, balancing laboratory costs, adequate sequencing depth and minimal  
241 sequencing errors in the assembled genomes.

242

243

## 244 **Materials and methods**

### 245 **Sampling**

246 Sludge biomass was sampled from the anaerobic digester at Fredericia wastewater treatment  
247 plant (Latitude 55.552219, Longitude 9.722003) at multiple time points and stored as frozen 2 mL  
248 aliquots at -20°C.

### 249 **DNA extraction**

250 DNA was extracted from the anaerobic digester sludge using DNeasy PowerSoil Kit (QIAGEN,  
251 Germany) following the manufacturer's protocol. The extracted DNA was then size selected using  
252 the SRE XS (Circulomics, USA), according to the manufacturer's instructions.

### 253 **DNA QC**

254 DNA concentrations were determined using Qubit dsDNA HS kit and measured with a Qubit 3.0  
255 fluorimeter (Thermo Fisher, USA). DNA size distribution was determined using an Agilent 2200  
256 TapeStation system with genomic screentapes (Agilent Technologies, USA). DNA purity was  
257 determined using a NanoDrop One Spectrophotometer (Thermo Fisher, USA).

### 258 **Nanopore DNA sequencing**

259 Library preparation was carried out using the SQK-LSK109 kit (Oxford Nanopore Technologies, UK)  
260 following the manufacturer's protocol. The DNA libraries were sequenced using the R.9.4.1 and the  
261 R.10.3 MinION flowcells (Oxford Nanopore Technologies, UK) on a MinION Mk1B (Oxford Nanopore  
262 Technologies, UK) device. After sequencing, the MinION flowcells were washed using the Flow Cell  
263 Wash Kit (EXP-WSH002, Oxford Nanopore Technologies, UK) and the same library was loaded again  
264 to generate additional sequencing data.

## 265 Illumina DNA sequencing

266 The Illumina libraries were prepared using the Nextera DNA library preparation kit (Illumina, USA)  
267 following the manufacturer's protocol and sequenced using the Illumina MiSeq platform.

## 268 PacBio CCS

269 Size-selected DNA sample was sent out to the DNA Sequencing Center at Brigham Young University.  
270 The DNA sample was fragmented with Megaruptor (Diagenode, Belgium) to 15 kb and size-selected  
271 using the Blue Pippin (Sage Science, USA). The sample was then prepared using SMRTbell Express  
272 Template Preparation Kit 1.0 (PacBio, USA) according to manufacturers' instructions. Sequencing  
273 was performed on the Sequel II system (PacBio, USA) using the Sequel II Sequencing Kit 1.0 (PacBio,  
274 USA) with the Sequel II SMRT Cell 8M (PacBio, USA) for a 30 hour data collection time.

## 275 Data analysis

### 276 Read processing

277 Illumina reads were trimmed for adapters using Cutadapt (v. 1.16 (70)). The generated raw  
278 Nanopore data was basecalled in super-accurate mode with using Guppy (v. 5.0.7,  
279 <https://community.nanoporetech.com/downloads>) with dna\_r9.4.1\_450bps\_sup.cfg model for R9  
280 and dna\_r10.3\_450bps\_sup.cfg model for R10 chemistry. Adapters for nanopore reads were  
281 removed using Porechop (v. 0.2.3 (71)) and read with Phred quality scores below 7 were filtered out  
282 using Filtlong (v. 0.1.1, <https://github.com/rwrick/Filtlong>). The CCS tool (v. 6.0.0, <https://ccs.how/>)  
283 was utilized with the sub-read data from PacBio CCS to produce HiFi reads. Read statistics were  
284 acquired via NanoPlot (v. 1.24.0 (72))

285

### 286 Metagenome assembly and binning

287 Long reads were assembled using Flye (v. 2.9-b1768 (73)) with the “--meta” setting enabled and the  
288 “--nano-hq” option for assembling Nanopore reads, whereas “--pacbio-hifi” and “--min-  
289 overlap 7500 --read-error 0.01” options were used for assembling PacBio CCS reads, as it resulted  
290 in more HQ MAGs than using the default settings. Polishing tools for Nanopore-based assemblies:  
291 Minimap2 (v. 2.17 (74)), Racon (used thrice, v. 1.3.3 (75)), and Medaka (used twice, v. 1.4.1,  
292 <https://github.com/nanoporetech/medaka>). Nanopore assemblies were additionally polished with  
293 Illumina reads using Racon. The trimmed Illumina reads were also assembled using Megahit (v.  
294 1.1.4 (76))  
295  
296 Automated binning was carried out using MetaBAT2 (v. 2.12.1 (77)), with “-s 500000” settings,  
297 MaxBin2 (v. 2.2.7) and Vamb (v. 3.0.2) with “-o C --minfasta 500000” settings. Contig coverage  
298 profiles from different sequencer data as well as 9 additional time series Illumina datasets of the  
299 same anaerobic digester were used for generating the bins. The binning output of different tools  
300 was then integrated and refined using DAS Tool (v. 1.1.2 (78)). CoverM (v. 0.6.1,  
301 <https://github.com/wwood/CoverM>) was applied to calculate the bin coverage (“-m mean”  
302 settings) and relative abundance (“-m relative\_abundance”) values.

303

## 304 Bin processing

305 The completeness and contamination of the genome bins was estimated using CheckM (v.  
306 1.1.2 (18)). The bins were classified using GDTB-Tk (v. 1.5.0 (79), R202 database). Bin protein  
307 sequences were predicted using Prodigal (v. 2.6.3, <https://github.com/hyattpd/Prodigal>) with  
308 “-p meta” setting, while rRNA genes were predicted using Barrnap (v. 0.9,  
309 <https://github.com/tseemann/barrnap>) and tRNAscan-SE (v. 2.0.5 (80)) was used for tRNA



310 predictions. Bin quality was determined following the Genomic Standards Consortium guidelines,  
311 wherein a MAG of high quality featured genome completeness of more than 90 %, less than 5 %  
312 contamination, at least 18 distinct tRNA genes and the 5S, 16S, 23S rRNA genes occurring at least  
313 once (14). MAGS with completeness above 50 % and contamination below 10 % were classified as  
314 medium quality, while low quality MAGs featured completeness below 50 % and contamination  
315 below 10 %. MAGs with contamination estimates higher than 10 % were classified as contaminated.

316  
317 Illumina reads were mapped to the metagenome assembly using Bowtie2 (v. 2.4.2 (81)) with the “-  
318 -very-sensitive-local” setting. The mapping was converted to BAM and sorted using SAMtools (v. 1.9  
319 (82)). Single nucleotide polymorphism rate was then calculated using CMseq (v. 1.0.3 (10)) from the  
320 mapping using poly.py script with “--mincov 10 --minqual 30” settings.

321  
322 Bins were clustered using dRep (v. 2.6.2 (83)) with “-comp 50 -con 10 -sa 0.95” settings. Only the  
323 bins that featured higher coverage than 10 in their respective sequencing platform and a higher  
324 Illumina read coverage than 5 for bins from the hybrid approach were included in downstream  
325 analysis. For IDEEL test (12), the predicted protein sequences from clustered bins were searched  
326 against the UniProt TrEMBL (84) database (release 2021\_01) using Diamond (v. 2.0.6 (85)). Query  
327 matches, which were not present in all datasets, were omitted to reduce noise.

328  
329 QUAST (v. 4.6.3 (86)) was applied on the clustered bins with less than 0.5 % SNP rate to acquire  
330 mismatch and indels metrics. Cases with Quast parameters “Genome Fraction” of less than 75 %  
331 and “Unaligned length” of more than 250 kb were omitted to reduce noise. For homopolymer  
332 analysis, the clustered bins were mapped to each other using “asm5” mode of Minimap2 and

333 Counterr (v. 0.1, <https://github.com/dayzerodx/counterr>) was used on the mapping files to get  
334 homopolymer calling errors. For QUAST and Counterr, PacBio CCS bins were used as reference  
335 sequences.

## 336 Data availability

337 The sequencing data and bins are available at the ENA with bio project ID: PRJEB48021. The code,  
338 datasets used to generate the figures and additional material are available at  
339 <https://github.com/Serka-M/Digester-MultiSequencing>.

## 340 Acknowledgements

341 We would like to acknowledge the plant operators at Fredericia wastewater treatment plant for  
342 supplying the sample material.

## 343 344 Funding information

345 The study was funded by research grants from VILLUM FONDEN (15510) and the Poul Due Jensen  
346 Foundation (Microflora Danica).

## 347 Author contributions

348 MS performed DNA extraction and size selection. RHK did Illumina and Nanopore sequencing of the  
349 sample. RHK and MS performed the bioinformatics. MS, RHK and MA wrote the manuscript. SMK,  
350 TYM and EAS contributed to experiment design, result interpretation and writing of the manuscript.  
351 All authors reviewed the manuscript.

352

353

354 **Conflict of interest**

355 EAS, SMK, MA, RHK are also employed at DNASense ApS. TYM is employed at Lyras A/S. The

356 remaining authors declare no conflict of interest.

357

358

## 359 References

- 360 1. Locey KJ, Lennon JT. 2016. Scaling laws predict global microbial diversity. *Proceedings of the*  
361 *National Academy of Sciences of the United States of America* 113:5970–5.
- 362 2. Tyson GW, Chapman J, Hugenholtz P, Allen EE, Ram RJ, Richardson PM, Solovyev V V, Rubin  
363 EM, Rokhsar DS, Banfield JF. 2004. Community structure and metabolism through  
364 reconstruction of microbial genomes from the environment. *Nature* 428:37–43.
- 365 3. Sharon I, Morowitz MJ, Thomas BC, Costello EK, Relman DA, Banfield JF. 2013. Time series  
366 community genomics analysis reveals rapid shifts in bacterial species, strains, and phage  
367 during infant gut colonization. *Genome research* 23:111–20.
- 368 4. Albertsen M, Hugenholtz P, Skarshewski A, Nielsen KL, Tyson GW, Nielsen PH. 2013.  
369 Genome sequences of rare, uncultured bacteria obtained by differential coverage binning of  
370 multiple metagenomes. *Nature biotechnology* 31:533–8.
- 371 5. Wu Y, Tang Y, Tringe SG, Simmons BA, Singer SW. 2014. MaxBin: an automated binning  
372 method to recover individual genomes from metagenomes using an expectation-  
373 maximization algorithm. *Microbiome* 2:26.
- 374 6. Kang DD, Froula J, Egan R, Wang Z. 2015. MetaBAT, an efficient tool for accurately  
375 reconstructing single genomes from complex microbial communities. *PeerJ* 3:e1165.
- 376 7. Alneberg J, Bjarnason BS, de Bruijn I, Schirmer M, Quick J, Ijaz UZ, Lahti L, Loman NJ,  
377 Andersson AF, Quince C. 2014. Binning metagenomic contigs by coverage and composition.  
378 *Nature methods* 11:1144–6.

- 379 8. Miller III, Rees ER, Ross J, Miller III, Baxa J, Lopera J, Kerby RL, Rey FE, Kwan JC. 2019.  
380 Autometa: automated extraction of microbial genomes from individual shotgun  
381 metagenomes. *Nucleic acids research* 47:e57.
- 382 9. Nayfach S, Shi ZJ, Seshadri R, Pollard KS, Kyrpides NC. 2019. New insights from uncultivated  
383 genomes of the global human gut microbiome. *Nature* 568:505–510.
- 384 10. Pasolli E, Asnicar F, Manara S, Zolfo M, Karcher N, Armanini F, Beghini F, Manghi P, Tett A,  
385 Ghensi P, Collado MC, Rice BL, DuLong C, Morgan XC, Golden CD, Quince C, Huttenhower C,  
386 Segata N. 2019. Extensive Unexplored Human Microbiome Diversity Revealed by Over  
387 150,000 Genomes from Metagenomes Spanning Age, Geography, and Lifestyle. *Cell*  
388 176:649-662.e20.
- 389 11. Parks DH, Rinke C, Chuvochina M, Chaumeil P, Woodcroft BJ, Evans PN, Hugenholtz P, Tyson  
390 GW. 2017. Recovery of nearly 8,000 metagenome-assembled genomes substantially  
391 expands the tree of life. *Nature microbiology* 2:1533–1542.
- 392 12. Stewart RD, Auffret MD, Warr A, Walker AW, Roehe R, Watson M. 2019. Compendium of  
393 4,941 rumen metagenome-assembled genomes for rumen microbiome biology and enzyme  
394 discovery. *Nature biotechnology* 37:953–961.
- 395 13. Singleton CM, Petriglieri F, Kristensen JM, Kirkegaard RH, Michaelsen TY, Andersen MH,  
396 Kondrotaitė Z, Karst SM, Dueholm MS, Nielsen PH, Albertsen M. 2021. Connecting structure  
397 to function with the recovery of over 1000 high-quality metagenome-assembled genomes  
398 from activated sludge using long-read sequencing. *Nat Commun* 12:2009.

- 399 14. Bowers RM, Kyrpides NC, Stepanauskas R, Harmon-smith M, Doud D, Reddy TBK, Schulz F,  
400 Jarett J, Rivers AR, Eloie-fadrosh EA, Tringe SG, Ivanova NN, Copeland A, Clum A, Becraft ED,  
401 Malmstrom RR, Birren B, Podar M, Bork P, Weinstock GM, Garrity GM, Dodsworth JA,  
402 Yooseph S, Sutton G, Glöckner FO, Gilbert JA, Nelson WC, Hallam SJ, Jungbluth SP, Ettema  
403 TJG, Tighe S, Konstantinidis KT, Liu WT, Baker BJ, Rattei T, Eisen JA, Hedlund B, McMahon  
404 KD, Fierer N, Knight R, Finn R, Cochrane G, Karsch-Mizrachi I, Tyson GW, Rinke C, Lapidus A,  
405 Meyer F, Yilmaz P, Parks DH, Eren AM, Schriml L, Banfield JF, Hugenholtz P, Woyke T. 2017.  
406 Minimum information about a single amplified genome (MISAG) and a metagenome-  
407 assembled genome (MIMAG) of bacteria and archaea. *Nature biotechnology* 35:725–731.
- 408 15. Parks DH, Chuvochina M, Chaumeil P-A, Rinke C, Mussig AJ, Hugenholtz P. 2020. A complete  
409 domain-to-species taxonomy for Bacteria and Archaea. *Nat Biotechnol* 38:1079–1086.
- 410 16. Tennessen K, Andersen E, Clingenpeel S, Rinke C, Lundberg DS, Han J, Dangl JL, Ivanova N,  
411 Woyke T, Kyrpides N, Pati A. 2016. ProDeGe: a computational protocol for fully automated  
412 decontamination of genomes. *The ISME journal* 10:269–72.
- 413 17. Koren S, Phillippy AM. 2015. One chromosome, one contig: complete microbial genomes  
414 from long-read sequencing and assembly. *Current Opinion in Microbiology* 23:110–120.
- 415 18. Parks DH, Imelfort M, Skennerton CT, Hugenholtz P, Tyson GW. 2015. CheckM: assessing the  
416 quality of microbial genomes recovered from isolates, single cells, and metagenomes.  
417 *Genome research* 25:1043–55.

- 418 19. Brown CT, Hug LA, Thomas BC, Sharon I, Castelle CJ, Singh A, Wilkins MJ, Wrighton KC,  
419 Williams KH, Banfield JF. 2015. Unusual biology across a group comprising more than 15% of  
420 domain Bacteria. *Nature* 523:208–11.
- 421 20. Sekiguchi Y, Ohashi A, Parks DH, Yamauchi T, Tyson GW, Hugenholtz P. 2015. First genomic  
422 insights into members of a candidate bacterial phylum responsible for wastewater bulking.  
423 *PeerJ* 3:e740.
- 424 21. Chen L-X, Anantharaman K, Shaiber A, Eren AM, Banfield JF. 2020. Accurate and complete  
425 genomes from metagenomes. *Genome Res* 30:315–333.
- 426 22. Treangen TJ, Salzberg SL. 2012. Repetitive DNA and next-generation sequencing:  
427 computational challenges and solutions. *Nat Rev Genet* 13:36–46.
- 428 23. Berbers B, Saltykova A, Garcia-Graells C, Philipp P, Arella F, Marchal K, Winand R, Vanneste  
429 K, Roosens NHC, De Keersmaecker SCJ. 2020. Combining short and long read sequencing to  
430 characterize antimicrobial resistance genes on plasmids applied to an unauthorized  
431 genetically modified *Bacillus*. *Scientific Reports* 10:4310.
- 432 24. Warwick-dugdale J, Solonenko N, Moore K, Chittick L, Gregory AC, Allen MJ, Sullivan MB,  
433 Temperton B. 2019. Long-read viral metagenomics captures abundant and microdiverse  
434 viral populations and their niche-defining genomic islands. *PeerJ* 1–28.
- 435 25. Ng P, Tan JJS, Ooi HS, Lee YL, Chiu KP, Fullwood MJ, Srinivasan KG, Perbost C, Du L, Sung W-  
436 K, Wei C-L, Ruan Y. 2006. Multiplex sequencing of paired-end ditags (MS-PET): a strategy for

- 437 the ultra-high-throughput analysis of transcriptomes and genomes. *Nucleic acids research*  
438 34:e84.
- 439 26. Korlach J, Marks PJ, Cicero RL, Gray JJ, Murphy DL, Roitman DB, Pham TT, Otto GA, Foquet  
440 M, Turner SW. 2008. Selective aluminum passivation for targeted immobilization of single  
441 DNA polymerase molecules in zero-mode waveguide nanostructures. *Proceedings of the*  
442 *National Academy of Sciences of the United States of America* 105:1176–81.
- 443 27. Jain M, Koren S, Miga KH, Quick J, Rand AC, Sasani TA, Tyson JR, Beggs AD, Diltney AT,  
444 Fiddes IT, Malla S, Marriott H, Nieto T, O’Grady J, Olsen HE, Pedersen BS, Rhie A, Richardson  
445 H, Quinlan AR, Snutch TP, Tee L, Paten B, Phillippy AM, Simpson JT, Loman NJ, Loose M.  
446 2018. Nanopore sequencing and assembly of a human genome with ultra-long reads.  
447 *Nature biotechnology* 36:338–345.
- 448 28. Kasianowicz JJ, Brandin E, Branton D, Deamer DW. 1996. Characterization of individual  
449 polynucleotide molecules using a membrane channel. *Proceedings of the National Academy*  
450 *of Sciences of the United States of America* 93:13770–3.
- 451 29. McCoy RC, Taylor RW, Blauwkamp T a., Kelley JL, Kertesz M, Pushkarev D, Petrov D a.,  
452 Fiston-Lavier A-S. 2014. Illumina TruSeq synthetic long-reads empower de novo assembly  
453 and resolve complex, highly-repetitive transposable elements. *PloS one* 9:e106689.
- 454 30. Bishara A, Moss EL, Kolmogorov M, Parada AE, Weng Z, Sidow A, Dekas AE, Batzoglou S,  
455 Bhatt AS. 2018. High-quality genome sequences of uncultured microbes by assembly of read  
456 clouds. *Nature biotechnology* 36:1067–1080.



- 457 31. Kuleshov V, Jiang C, Zhou W, Jahanbani F, Batzoglou S, Snyder M. 2016. Synthetic long-read  
458 sequencing reveals intraspecies diversity in the human microbiome. *Nature biotechnology*  
459 34:64–9.
- 460 32. Sharon I, Kertesz M, Hug LA, Pushkarev D, Blauwkamp TA, Castelle CJ, Amirebrahimi M,  
461 Thomas BC, Burstein D, Tringe SG, Williams KH, Banfield JF. 2015. Accurate, multi-kb reads  
462 resolve complex populations and detect rare microorganisms. *Genome research* 25:534–43.
- 463 33. White RA, Bottos EM, Roy Chowdhury T, Zucker JD, Brislawn CJ, Nicora CD, Fansler SJ,  
464 Glaesemann KR, Glass K, Jansson JK. 2016. Molecuro Long-Read Sequencing Facilitates  
465 Assembly and Genomic Binning from Complex Soil Metagenomes. *mSystems* 11:1–15.
- 466 34. Frank JA, Pan Y, Tooming-Klunderud A, Eijsink VGH, McHardy AC, Nederbragt AJ, Pope PB.  
467 2016. Improved metagenome assemblies and taxonomic binning using long-read circular  
468 consensus sequence data. *Scientific reports* 6:25373.
- 469 35. Daims H, Lebedeva E V, Pjevac P, Han P, Herbold C, Albertsen M, Jehmlich N, Palatinszky M,  
470 Vierheilig J, Bulaev A, Kirkegaard RH, von Bergen M, Rattei T, Bendinger B, Nielsen PH,  
471 Wagner M. 2015. Complete nitrification by *Nitrospira* bacteria. *Nature* 528:504–9.
- 472 36. Bertrand D, Shaw J, Kalathiyappan M, Ng AHQ, Kumar MS, Li C, Dvornicic M, Soldo JP, Koh  
473 JY, Tong C, Ng OT, Barkham T, Young B, Marimuthu K, Chng KR, Sikic M, Nagarajan N. 2019.  
474 Hybrid metagenomic assembly enables high-resolution analysis of resistance determinants  
475 and mobile elements in human microbiomes. *Nature biotechnology* 37:937–944.

- 476 37. Slaby BM, Hackl T, Horn H, Bayer K, Hentschel U. 2017. Metagenomic binning of a marine  
477 sponge microbiome reveals unity in defense but metabolic specialization. *The ISME journal*  
478 11:2465–2478.
- 479 38. Arumugam K, Bessarab I, Haryono MAS, Liu X, Zuniga–Montanez RE, Roy S, Qiu G, Drautz–  
480 Moses DI, Law YY, Wuertz S, Lauro FM, Huson DH, Williams RBH. 2021. Recovery of  
481 complete genomes and non-chromosomal replicons from activated sludge enrichment  
482 microbial communities with long read metagenome sequencing. *npj Biofilms Microbiomes*  
483 7:23.
- 484 39. Karst SM, Ziels RM, Kirkegaard RH, Sørensen EA, McDonald D, Zhu Q, Knight R, Albertsen M.  
485 2021. High-accuracy long-read amplicon sequences using unique molecular identifiers with  
486 Nanopore or PacBio sequencing. *Nat Methods* 18:165–169.
- 487 40. Rhoads A, Au KF. 2015. PacBio Sequencing and Its Applications. *Genomics, Proteomics &*  
488 *Bioinformatics* 13:278–289.
- 489 41. Koren S, Phillippy AM, Simpson JT, Loman NJ, Loose M. 2019. Reply to “Errors in long-read  
490 assemblies can critically affect protein prediction”. *Nature biotechnology* 37:127–128.
- 491 42. Nicholls SM, Quick JC, Tang S, Loman NJ. 2019. Ultra-deep, long-read nanopore sequencing  
492 of mock microbial community standards. *GigaScience* 8:1–9.
- 493 43. Browne PD, Nielsen TK, Kot W, Aggerholm A, Gilbert MTP, Puetz L, Rasmussen M, Zervas A,  
494 Hansen LH. 2020. GC bias affects genomic and metagenomic reconstructions,  
495 underrepresenting GC-poor organisms. *Gigascience* 9:giaa008.

- 496 44. Wick RR, Judd LM, Wyres KL, Holt KEY 2021. 2021. Recovery of small plasmid sequences via  
497 Oxford Nanopore sequencing. *Microbial Genomics* 7:000631.
- 498 45. O'Donnell CR, Wang H, Dunbar WB. 2013. Error analysis of idealized nanopore sequencing.  
499 *Electrophoresis* 34:2137–2144.
- 500 46. Scheunert A, Dorfner M, Lingl T, Oberprieler C. 2020. Can we use it? On the utility of de  
501 novo and reference-based assembly of Nanopore data for plant plastome sequencing. *PLoS*  
502 *One* 15.
- 503 47. Cusco A, Perez D, Viñes J, Francino O. 2020. Long-Read Metagenomics to Retrieve High-  
504 Quality Metagenome-Assembled Genomes from Canine Feces. *Research Square*  
505 <https://doi.org/10.21203/rs.3.rs-60068/v1>.
- 506 48. Huang Y-T, Liu P-Y, Shih P-W. 2021. Homopolish: a method for the removal of systematic  
507 errors in nanopore sequencing by homologous polishing. *Genome Biol* 22:95.
- 508 49. Hu J, Ng PC. 2012. Predicting the effects of frameshifting indels. *Genome Biol* 13:R9.
- 509 50. Korlach J, Gedman G, Kingan SB, Chin C-S, Howard JT, Audet J-N, Cantin L, Jarvis ED. 2017.  
510 De novo PacBio long-read and phased avian genome assemblies correct and add to  
511 reference genes generated with intermediate and short reads. *Gigascience* 6:1–16.
- 512 51. Delahaye C, Nicolas J. 2021. Sequencing DNA with nanopores: Troubles and biases. *PLoS*  
513 *One* 16:e0257521.

- 514 52. Wick RR, Judd LM, Gorrie CL, Holt KE. 2017. Unicycler: Resolving bacterial genome  
515 assemblies from short and long sequencing reads. *PLoS computational biology*  
516 13:e1005595.
- 517 53. Overholt WA, Hölzer M, Geesink P, Diezel C, Marz M, Küsel K. 2020. Inclusion of Oxford  
518 Nanopore long reads improves all microbial and viral metagenome-assembled genomes  
519 from a complex aquifer system. *Environ Microbiol* 22:4000–4013.
- 520 54. Liu L, Wang Y, Che Y, Chen Y, Xia Y, Luo R, Cheng SH, Zheng C, Zhang T. 2020. High-quality  
521 bacterial genomes of a partial-nitritation/anammox system by an iterative hybrid assembly  
522 method. *Microbiome* 8:155.
- 523 55. Karlsson E, Lärkeryd A, Sjödin A, Forsman M, Stenberg P. 2015. Scaffolding of a bacterial  
524 genome using MinION nanopore sequencing. *Scientific Reports* 5:11996.
- 525 56. De Maio N, Shaw LP, Hubbard A, George S, Sanderson ND, Swann J, Wick R, AbuOun M,  
526 Stubberfield E, Hoosdally SJ, Crook DW, Peto TEA, Sheppard AE, Bailey MJ, Read DS, Anjum  
527 MF, Walker AS, Stoesser N, On Behalf Of The Rehab Consortium null. 2019. Comparison of  
528 long-read sequencing technologies in the hybrid assembly of complex bacterial genomes.  
529 *Microb Genom* 5.
- 530 57. Gan HM, Tan MH, Austin CM, Sherman CDH, Wong YT, Strugnell J, Gervis M, McPherson L,  
531 Miller AD. 2019. Best Foot Forward: Nanopore Long Reads, Hybrid Meta-Assembly, and  
532 Haplotig Purging Optimizes the First Genome Assembly for the Southern Hemisphere  
533 Blacklip Abalone (*Haliotis rubra*). *Front Genet* 10.

- 534 58. Shin SC, Kim H, Lee JH, Kim H-W, Park J, Choi B-S, Lee S-C, Kim JH, Lee H, Kim S. 2019.  
535 Nanopore sequencing reads improve assembly and gene annotation of the *Parochlus*  
536 *steinenii* genome. *Sci Rep* 9:5095.
- 537 59. Haghshenas E, Asghari H, Stoye J, Chauve C, Hach F. 2020. HASLR: Fast Hybrid Assembly of  
538 Long Reads. *iScience* 23.
- 539 60. Maguire F, Jia B, Gray KL, Lau WYV, Beiko RG, Brinkman FSL. 2020. Metagenome-assembled  
540 genome binning methods with short reads disproportionately fail for plasmids and genomic  
541 Islands. *Microbial Genomics*, 6:e000436.
- 542 61. Ross MG, Russ C, Costello M, Hollinger A, Lennon NJ, Hegarty R, Nusbaum C, Jaffe DB. 2013.  
543 Characterizing and measuring bias in sequence data. *Genome Biology* 14:R51.
- 544 62. Modlin SJ, Robinhold C, Morrissey C, Mitchell SN, Ramirez-Busby SM, Shmaya T, Valafar F.  
545 2021. Exact mapping of Illumina blind spots in the *Mycobacterium tuberculosis* genome  
546 reveals platform-wide and workflow-specific biases. *Microbial Genomics* 7.
- 547 63. Arumugam K, Bağcı C, Bessarab I, Beier S, Buchfink B, Górska A, Qiu G, Huson DH, Williams  
548 RBH. 2019. Annotated bacterial chromosomes from frame-shift-corrected long-read  
549 metagenomic data. *Microbiome* 7:61.
- 550 64. Huson DH, Albrecht B, Bağcı C, Bessarab I, Górska A, Jolic D, Williams RBH. 2018. MEGAN-LR:  
551 new algorithms allow accurate binning and easy interactive exploration of metagenomic  
552 long reads and contigs. *Biology Direct* 13:6.

- 553 65. Hackl T, Trigodet F, Eren AM, Biller SJ, Eppley JM, Luo E, Burger A, DeLong EF, Fischer MG.  
554 2021. proofframe: frameshift-correction for long-read (meta)genomics. bioRxiv  
555 2021.08.23.457338.
- 556 66. Tørresen OK, Star B, Mier P, Andrade-Navarro MA, Bateman A, Jarnot P, Gruca A, Grynberg  
557 M, Kajava AV, Promponas VJ, Anisimova M, Jakobsen KS, Linke D. 2019. Tandem repeats  
558 lead to sequence assembly errors and impose multi-level challenges for genome and protein  
559 databases. *Nucleic Acids Research* 47:10994.
- 560 67. Karst SM, Dueholm MS, McIlroy SJ, Kirkegaard RH, Nielsen PH, Albertsen M. 2018. Retrieval  
561 of a million high-quality, full-length microbial 16S and 18S rRNA gene sequences without  
562 primer bias. *Nat Biotechnol* 36:190–195.
- 563 68. Amann RI, Krumholz L, Stahl DA. 1990. Fluorescent-oligonucleotide probing of whole cells  
564 for determinative, phylogenetic, and environmental studies in microbiology. *J Bacteriol*  
565 172:762–770.
- 566 69. Yilmaz P, Parfrey LW, Yarza P, Gerken J, Pruesse E, Quast C, Schweer T, Peplies J, Ludwig W,  
567 Glöckner FO. 2014. The SILVA and “All-species Living Tree Project (LTP)” taxonomic  
568 frameworks. *Nucleic Acids Res* 42:D643–D648.
- 569 70. Martin M. 2011. Cutadapt removes adapter sequences from high-throughput sequencing  
570 reads. *EMBnet.journal* 17:10.
- 571 71. Wick RR, Judd LM, Gorrie CL, Holt KE. 2017. Completing bacterial genome assemblies with  
572 multiplex MinION sequencing. *Microbial genomics* 3:e000132.

- 573 72. De Coster W, D’Hert S, Schultz DT, Cruets M, Van Broeckhoven C. 2018. NanoPack: visualizing  
574 and processing long-read sequencing data. *Bioinformatics* 34:2666–2669.
- 575 73. Kolmogorov M, Yuan J, Lin Y, Pevzner PA. 2019. Assembly of long, error-prone reads using  
576 repeat graphs. *Nature biotechnology* 37:540–546.
- 577 74. Li H. 2016. Minimap and miniasm: fast mapping and de novo assembly for noisy long  
578 sequences. *Bioinformatics (Oxford, England)* 32:2103–10.
- 579 75. Vaser R, Sović I, Nagarajan N, Šikić M. 2017. Fast and accurate de novo genome assembly  
580 from long uncorrected reads. *Genome research* 27:737–746.
- 581 76. Li D, Liu C-M, Luo R, Sadakane K, Lam T-W. 2015. MEGAHIT: an ultra-fast single-node  
582 solution for large and complex metagenomics assembly via succinct de Bruijn graph.  
583 *Bioinformatics (Oxford, England)* 31:1674–6.
- 584 77. Kang DD, Li F, Kirton E, Thomas A, Egan R, An H, Wang Z. 2019. MetaBAT 2: an adaptive  
585 binning algorithm for robust and efficient genome reconstruction from metagenome  
586 assemblies. *PeerJ* 7:e7359.
- 587 78. Sieber CMK, Probst AJ, Sharrar A, Thomas BC, Hess M, Tringe SG, Banfield JF. 2018. Recovery  
588 of genomes from metagenomes via a dereplication, aggregation and scoring strategy. *Nat*  
589 *Microbiol* 3:836–843.
- 590 79. Parks DH, Chuvochina M, Waite DW, Rinke C, Skarshewski A, Chaumeil P-A, Hugenholtz P.  
591 2018. A standardized bacterial taxonomy based on genome phylogeny substantially revises  
592 the tree of life. *Nature biotechnology* 36:996–1004.

- 593 80. Chan PP, Lowe TM. 2019. tRNAscan-SE: Searching for tRNA Genes in Genomic Sequences.  
594 Methods Mol Biol 1962:1–14.
- 595 81. Langmead B, Salzberg SL. 2012. Fast gapped-read alignment with Bowtie 2. Nature methods  
596 9:357–9.
- 597 82. Li H, Handsaker B, Wysoker A, Fennell T, Ruan J, Homer N, Marth G, Abecasis G, Durbin R,  
598 1000 Genome Project Data Processing Subgroup. 2009. The Sequence Alignment/Map  
599 format and SAMtools. Bioinformatics (Oxford, England) 25:2078–9.
- 600 83. Olm MR, Brown CT, Brooks B, Banfield JF. 2017. dRep: a tool for fast and accurate genomic  
601 comparisons that enables improved genome recovery from metagenomes through de-  
602 replication. The ISME journal 11:2864–2868.
- 603 84. 2017. UniProt: the universal protein knowledgebase. Nucleic Acids Res 45:D158–D169.
- 604 85. Buchfink B, Xie C, Huson DH. 2015. Fast and sensitive protein alignment using DIAMOND.  
605 Nat Methods 12:59–60.
- 606 86. Gurevich A, Saveliev V, Vyahhi N, Tesler G. 2013. QUASt: Quality assessment tool for  
607 genome assemblies. Bioinformatics 29:1072–1075.
- 608
- 609



610 SUPPLEMENT  
611

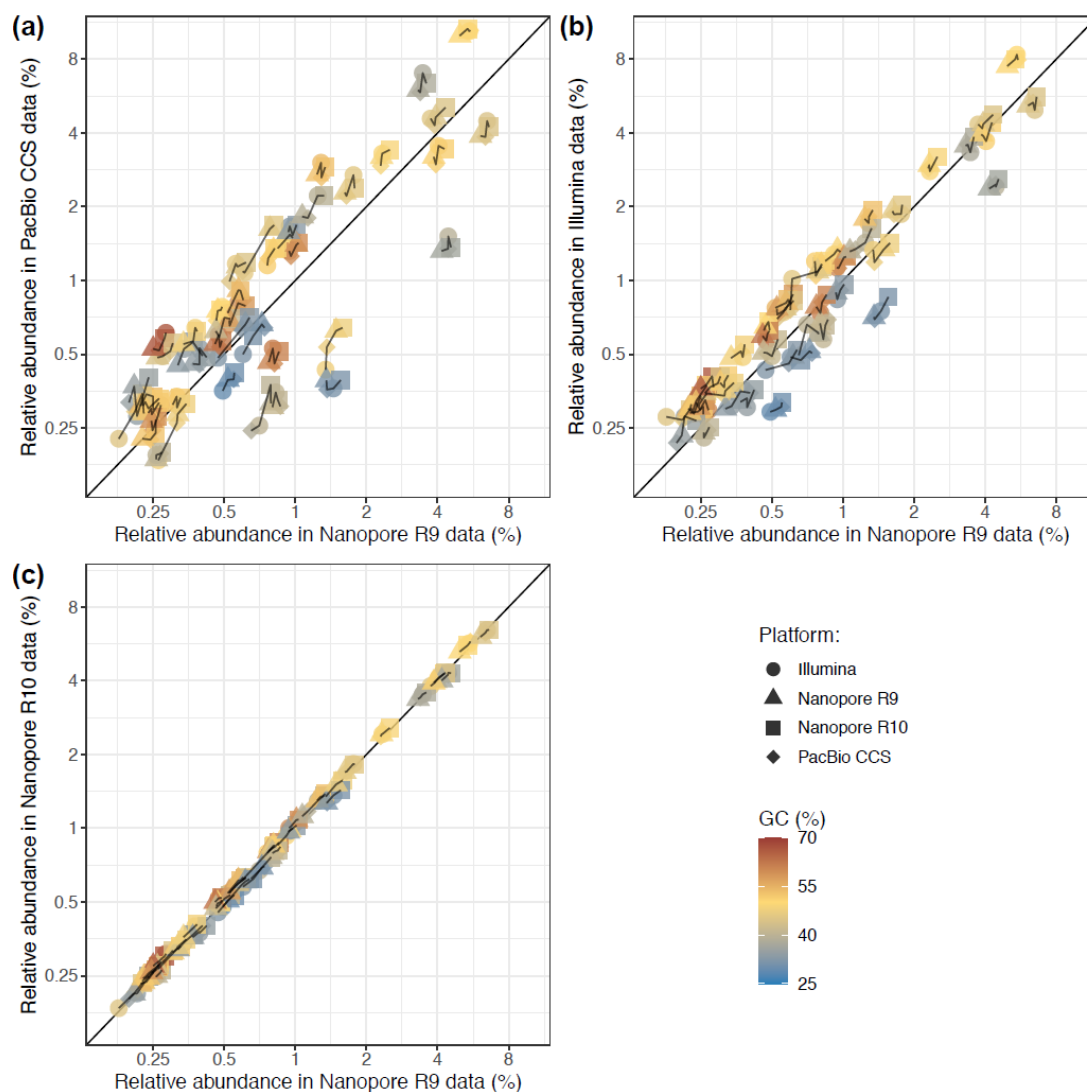

612 **Supplemental Figure 1. Comparison of bin relative abundances between different sequencing**  
613 **platforms.** Relative abundance values (log-scaled) are presented between the Nanopore R9 data  
614 and **a) PacBio CCS, b) Illumina, c) Nanopore R10.** Only the bins that were clustered together between  
615 different platforms are presented in the plots and are interlinked.  
616  
617

618  
619

**Supplemental Table 1. Overview of read datasets used in the study**

| Read dataset | Instrument       | Yield (Gb) | Read N50 (kb) | Read count | ENA sample ID |
|--------------|------------------|------------|---------------|------------|---------------|
| IL-201104    | Illumina HiSeq   | 6.2        | 0.15          | 42,727,130 | ERS7673063    |
| IL-201112    | Illumina HiSeq   | 11.4       | 0.15          | 79,619,634 | ERS7673064    |
| IL-201301    | Illumina HiSeq   | 7.5        | 0.25          | 31,702,618 | ERS7673065    |
| IL-201308    | Illumina HiSeq   | 6.7        | 0.25          | 28,067,586 | ERS7673066    |
| IL-201502    | Illumina HiSeq   | 5.3        | 0.25          | 22,351,578 | ERS7673067    |
| IL-201702    | Illumina HiSeq   | 15.9       | 0.25          | 66,225,442 | ERS7673068    |
| IL-201705    | Illumina HiSeq   | 4.9        | 0.25          | 20,492,240 | ERS7673069    |
| IL-201707    | Illumina HiSeq   | 5.5        | 0.25          | 23,663,146 | ERS7673070    |
| IL-201804    | Illumina MiSeq   | 3.2        | 0.3           | 11,981,252 | ERS7673071    |
| IL-202001    | Illumina MiSeq   | 13.3       | 0.3           | 47,091,904 | ERS7673072    |
| PB-202001    | PacBio Sequel II | 15.3       | 15.4          | 992,914    | ERS7673073    |
| R9-202001    | MinION Mk1B      | 35.2       | 5.9           | 10,266,261 | ERS7673074    |
| R10-202001   | MinION Mk1B      | 13.0       | 6.4           | 3,646,771  | ERS7673075    |

620  
621

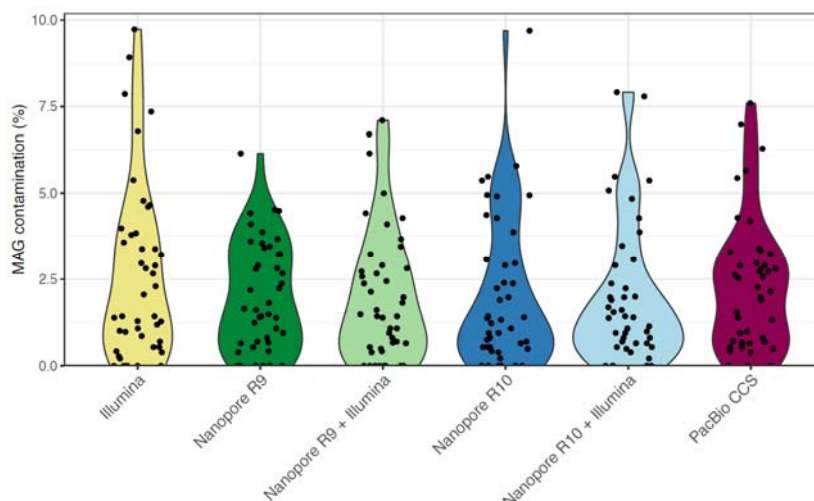

622  
623  
624  
625

**Supplemental Figure 2. Bin contamination estimates.** Only the bins that were clustered together between different platforms are presented in the plot.

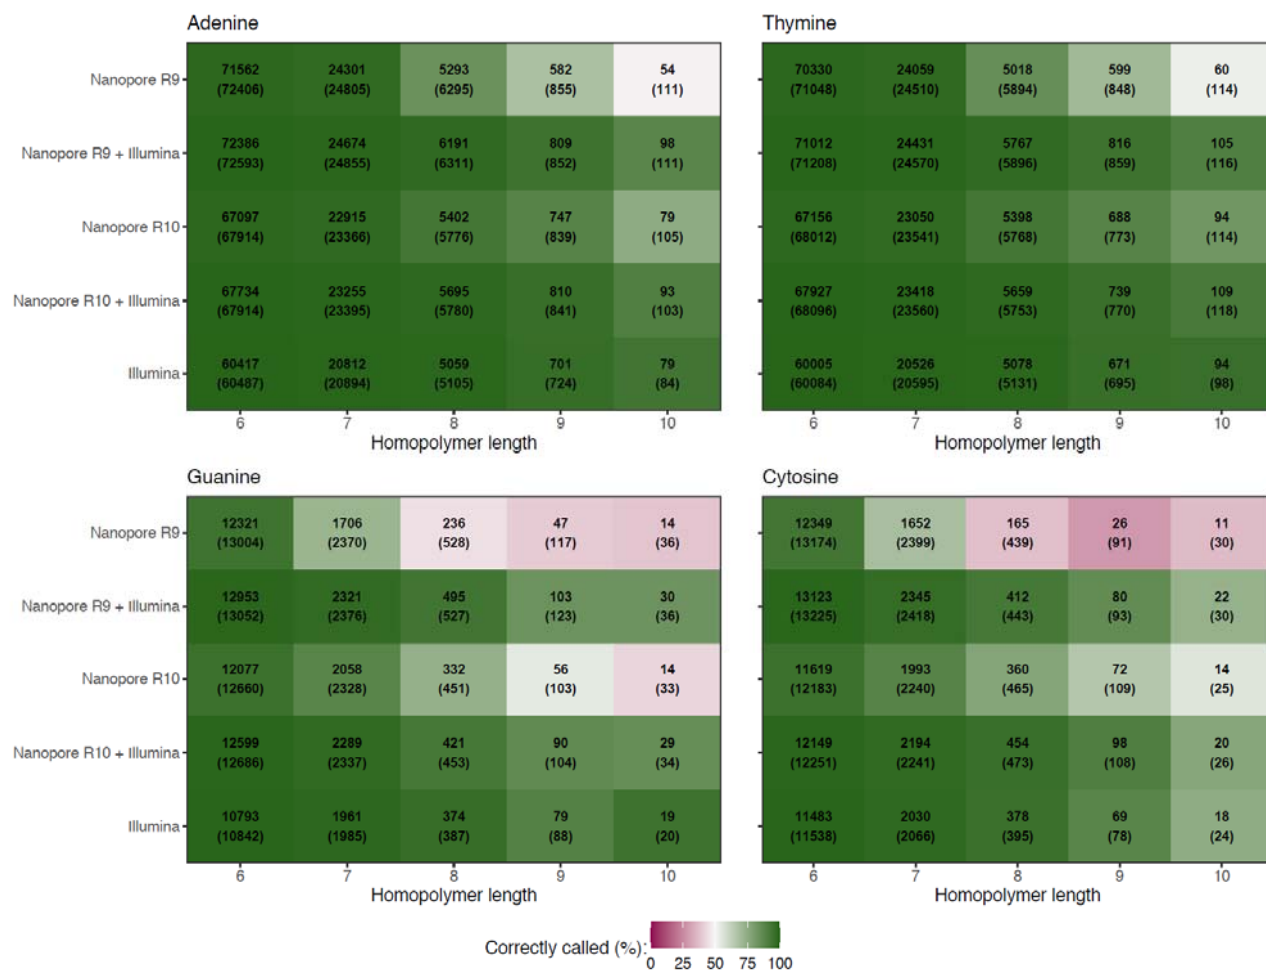

626  
627  
628  
629  
630  
631  
632

**Supplemental Figure 3. Homopolymer calling estimates in metagenomes from different sequencing platforms.** Values in the heatmap show observed homopolymer counts estimated to be called correctly at given sequence length. The total count of homopolymers (called correctly and incorrectly) are in brackets. Only the contigs for bins that were clustered together between different platforms were used to generate values for the plot.

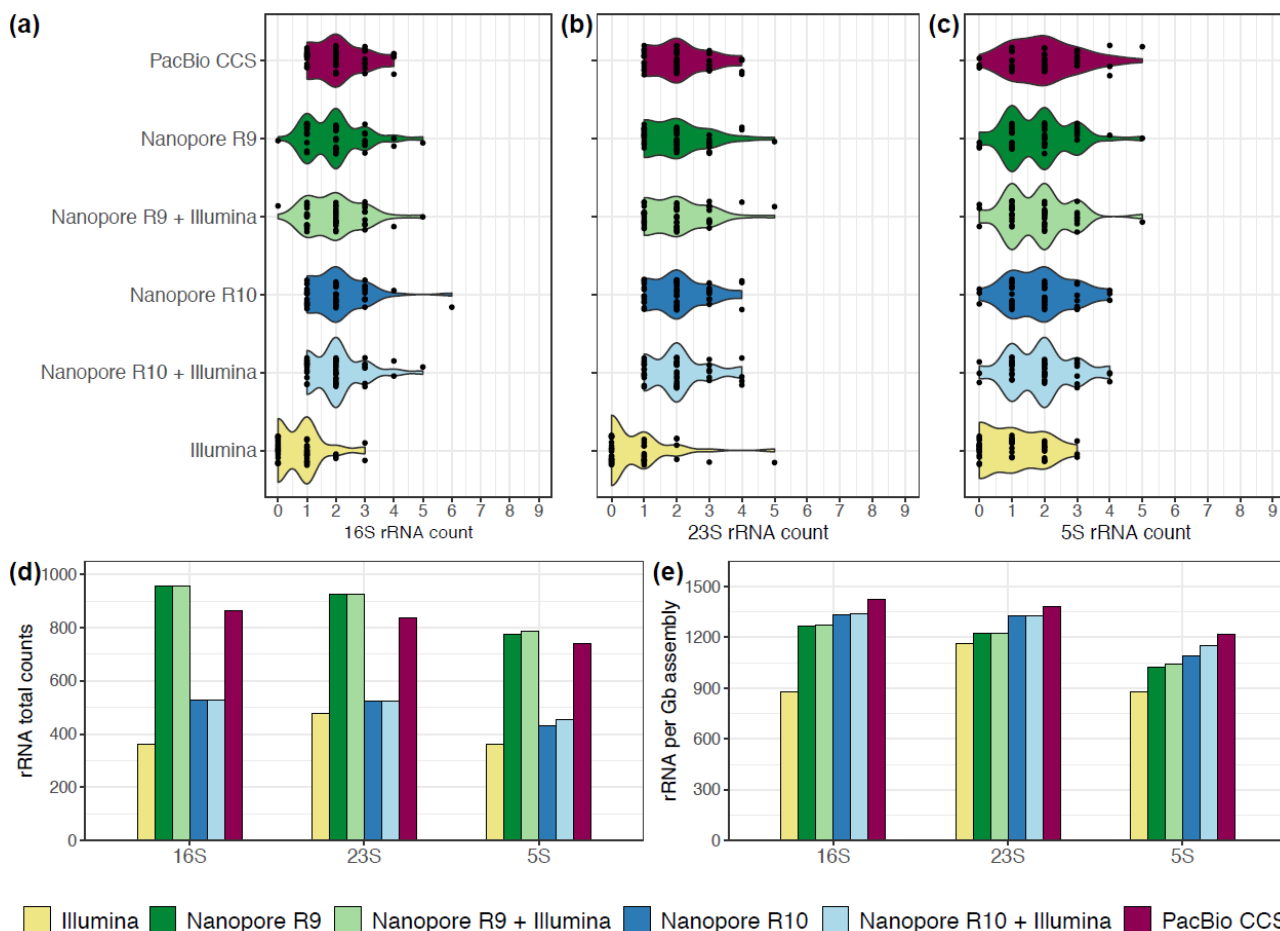

633  
 634 **Supplemental Figure 4. Recovery of rRNA genes from complex microbial communities via different**  
 635 **sequencing techniques.** Distribution of rRNA gene counts, found in MAGs from different sequencing  
 636 methods, are presented for **a)** 16S, **b)** 23S and **c)** 5S rRNA genes. Only the MAGs, which clustered  
 637 together between all the different sequencing approaches, were included in the plots. **d)** Counts for  
 638 total rRNA sequences that were recovered from the assembled metagenomes. **e)** Recovered rRNA  
 639 gene counts, normalized to assembly size.

640

641

**Supplemental Table 2. Statistics for rRNA sequence recovery from metagenome assemblies.**

642

| Feature                 | Illumina | Nanopore R9 | Nanopore R10 | PacBio CCS |
|-------------------------|----------|-------------|--------------|------------|
| Sequencing yield (Gb)   | 13.3     | 35.2        | 13.0         | 15.3       |
| Assembly size (Gb)      | 0.41     | 0.75        | 0.40         | 0.61       |
| 16S rRNA count          | 360      | 958         | 528          | 862        |
| 16S RNA per Gb yield    | 27.1     | 27.2        | 40.6         | 56.3       |
| 16S RNA per Gb assembly | 878      | 1,277       | 1,320        | 1,413      |
| 23S rRNA count          | 476      | 924         | 524          | 838        |
| 23S RNA per Gb yield    | 35.8     | 26.2        | 40.3         | 54.7       |
| 23S RNA per Gb assembly | 1,160    | 1,232       | 1,310        | 1,373      |
| 5S rRNA count           | 360      | 774         | 432          | 704        |
| 5S RNA per Gb yield     | 27.1     | 22.0        | 33.2         | 46.0       |
| 5S RNA per Gb assembly  | 878      | 1,032       | 1,080        | 1,154      |

651

652
